# Supplementary material for: Thermodynamic Solubility Profile of Temozolomide in Different Commonly Used Pharmaceutical Solvents
Source: MDPI journal article supplement (doi:10.3390/molecules27041437), 2022-02-21
Supplement: s1 [file s1]

**Thermodynamic solubility profile of temozolomide in different commonly used  
pharmaceutical solvents**

Abdul Ahad<sup>a,\*</sup>, Faiyaz Shakeel<sup>a</sup>, Mohammad Raish<sup>a</sup>, Ajaz Ahmad<sup>b</sup>, Yousef A. Bin Jordan<sup>a</sup>,

Fahad I. Al-Jenoobi<sup>a</sup>, Abdullah M. Al-Mohizea<sup>a</sup>

<sup>a</sup>*“Department of Pharmaceutics, College of Pharmacy, King Saud University, Riyadh 11451,  
Saudi Arabia”.*

<sup>b</sup>*“Department of Clinical Pharmacy, College of Pharmacy, King Saud University, Riyadh 11451,  
Saudi Arabia”.*

**\*Corresponding Author: Dr. Abdul Ahad**

“Department of Pharmaceutics, College of Pharmacy,

King Saud University, P.O. Box 2457, Riyadh 11451, Saudi Arabia”.

Email: [abdulahad20@yahoo.com](mailto:abdulahad20@yahoo.com), [aahad@ksu.edu.sa](mailto:aahad@ksu.edu.sa)

## ***Materials***

TMZ was purchased from “Tokyo Chemical Industry Co., Ltd. (Tokyo, Japan)”. DMSO and 1-BuOH were bought from “BDH Laboratory Supplies (Poole, UK)”. EA was acquired from “Winlab Ltd. (Leicestershire, UK)”. EG and PG were obtained from “Anova Chem (Hurden, Switzerland)”. EtOH was bought from “Sigma-Aldrich (St. Louis, MO, USA)”. IPA was obtained from “Panreac Química, S.A.U. (Barcelona, Spain)”. Milli-Q H<sub>2</sub>O was obtained from a “Millipore system (Millipore SAS, Molsheim, France)”. PEG-400 was obtained from “Merck Schuchardt (Munchen, Germany)”. TC was purchased from “Sigma-Aldrich (St. Louis, MO, USA)” (Table S1).

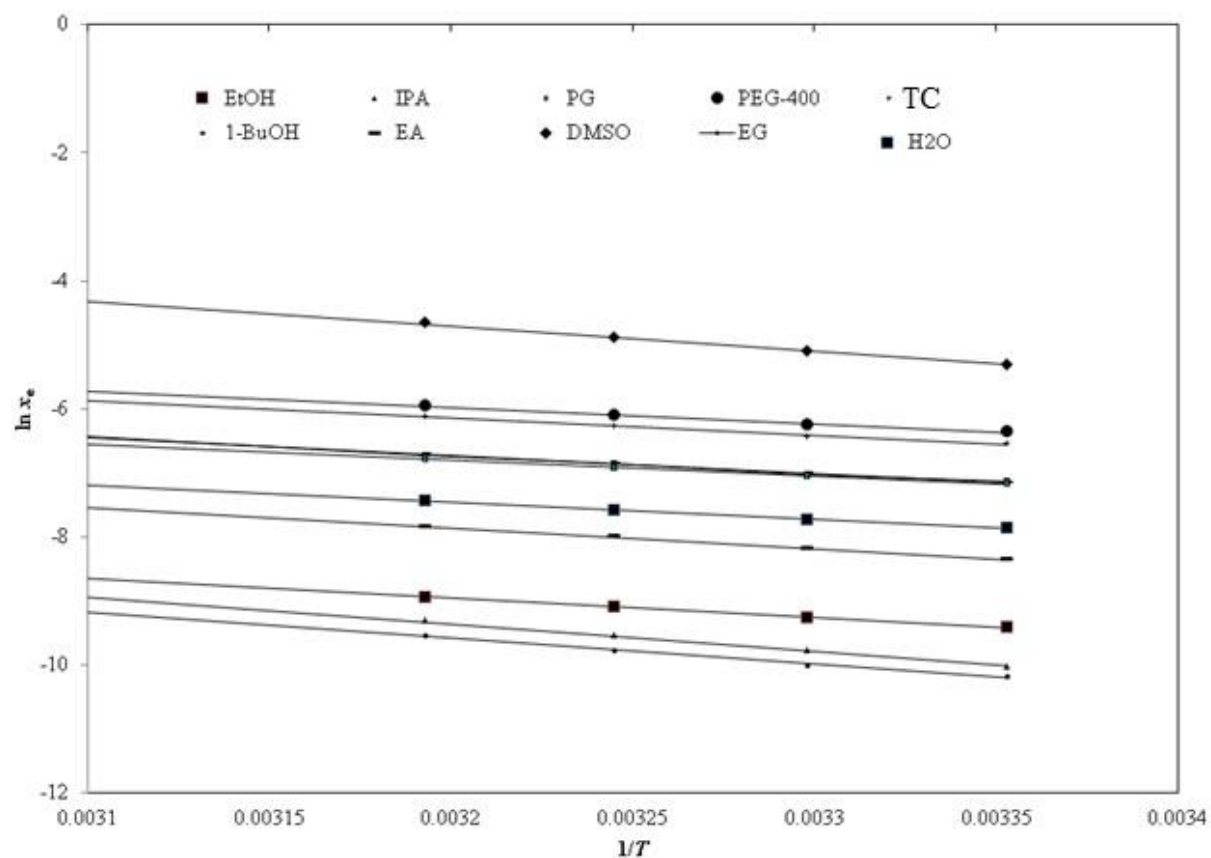

**Figure S1:** Correlation of  $\ln x_e$  values of TMZ with “Van’t Hoff model” in various neat solvents as a function of  $1/T$ ; symbols represent the experimental solubilities of TMZ and solid lines represent the solubilities of TMZ estimated by “Van’t Hoff model”.

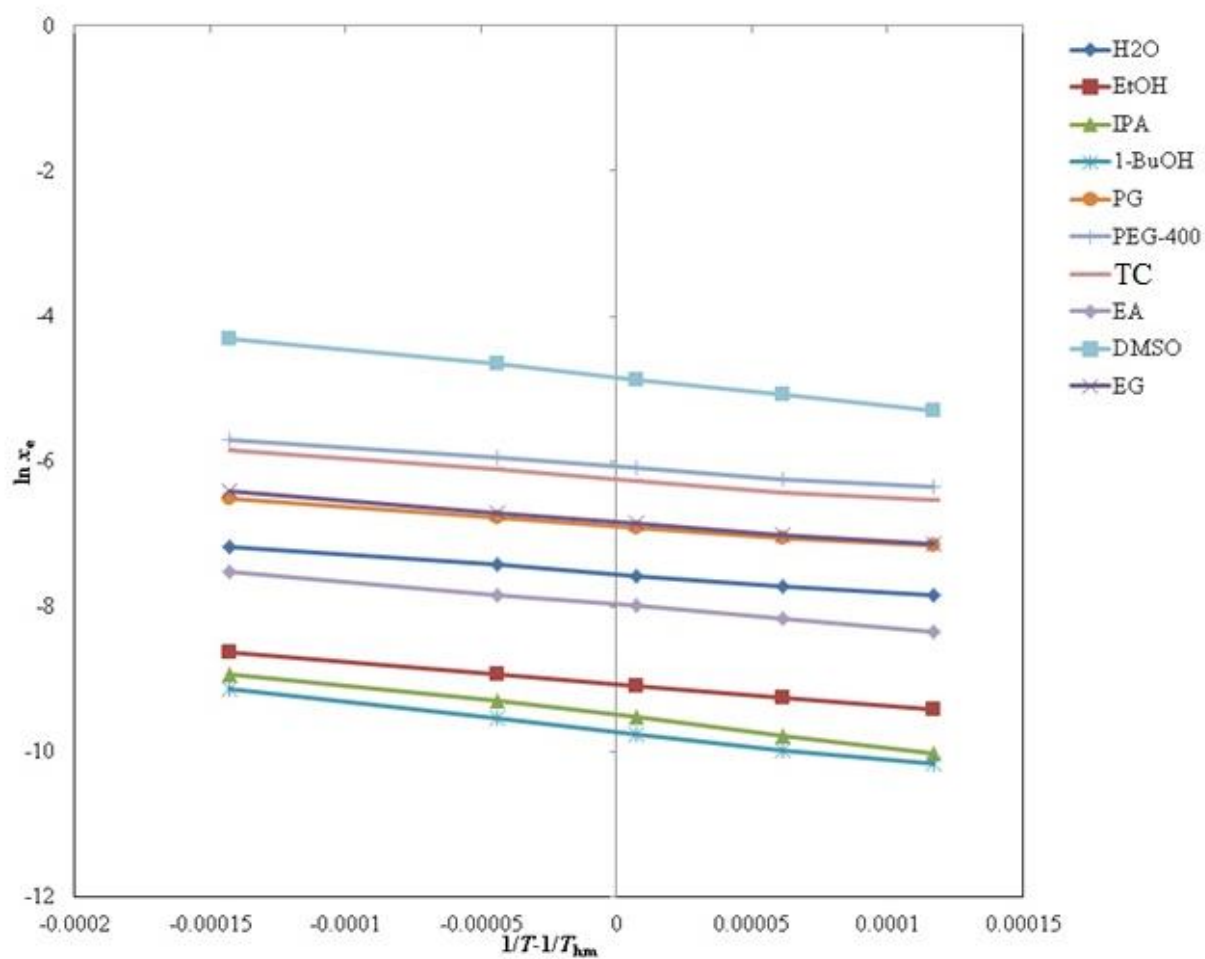

**Figure S2:** Van't Hoff plots for TMZ plotted between  $\ln x_e$  and  $1/T - 1/T_{hm}$  in various examined solvents.

**Table S1.** A sample table for materials.

| Material | Molecular<br>formula                                        | Molar mass (g mol <sup>-1</sup> ) | CAS Registry no. | Purification<br>method | Mass fraction<br>purity | Source                     |
|----------|-------------------------------------------------------------|-----------------------------------|------------------|------------------------|-------------------------|----------------------------|
| TMZ      | C <sub>6</sub> H <sub>6</sub> N <sub>6</sub> O <sub>2</sub> | 194.15                            | 85622-93-1       | None                   | 0.980                   | Tokyo Chemical<br>Industry |
| EtOH     | C <sub>2</sub> H <sub>5</sub> OH                            | 46.07                             | 64-17-5          | None                   | 0.995                   | Sigma-Aldrich              |
| EG       | C <sub>2</sub> H <sub>6</sub> O <sub>2</sub>                | 62.07                             | 107-21-1         | None                   | 0.996                   | Annova Chem                |
| TC       | C <sub>6</sub> H <sub>14</sub> O <sub>3</sub>               | 134.17                            | 111-90-0         | None                   | 0.999                   | Gattefosse                 |
| PG       | C <sub>3</sub> H <sub>8</sub> O <sub>2</sub>                | 76.09                             | 57-55-6          | None                   | 0.995                   | Annova Chem                |
| PEG-400  | H(OCH <sub>2</sub> CH <sub>2</sub> ) <sub>n</sub><br>OH     | 400                               | 25322-68-3       | None                   | 0.999                   | Merck Schuchardt           |
| IPA      | C <sub>3</sub> H <sub>8</sub> O                             | 60.10                             | 67-63-0          | None                   | 0.997                   | Panreac Química            |
| 1-BuOH   | C <sub>4</sub> H <sub>10</sub> O                            | 74.12                             | 71-36-3          | None                   | 0.998                   | BDH Laboratory             |

|                  |                                              |       |           |      |       | Supplies                   |
|------------------|----------------------------------------------|-------|-----------|------|-------|----------------------------|
| DMSO             | C <sub>2</sub> H <sub>6</sub> OS             | 78.13 | 67-68-5   | None | 0.990 | BDH Laboratory<br>Supplies |
| EA               | C <sub>4</sub> H <sub>8</sub> O <sub>2</sub> | 88.11 | 141-78-6  | None | 0.998 | Winlab limited             |
| H <sub>2</sub> O | H <sub>2</sub> O                             | 18.07 | 7732-18-5 | None | -     | Milli-Q                    |

**Table S2.** Hansen solubility parameters of TMZ and various neat solvents at  $T = 298.2$  K.

| Components       | Hansen solubility parameters |                             |                             |                           |
|------------------|------------------------------|-----------------------------|-----------------------------|---------------------------|
|                  | $\delta_d/\text{MPa}^{1/2}$  | $\delta_p/\text{MPa}^{1/2}$ | $\delta_h/\text{MPa}^{1/2}$ | $\delta/\text{MPa}^{1/2}$ |
| TMZ              | 17.80                        | 20.50                       | 13.40                       | 30.30                     |
| H <sub>2</sub> O | 15.50                        | 16.00                       | 42.30                       | 47.80                     |
| EtOH             | 16.20                        | 8.40                        | 17.60                       | 25.40                     |
| EG               | 18.00                        | 11.10                       | 23.40                       | 31.60                     |
| PG               | 17.40                        | 9.10                        | 21.70                       | 29.20                     |
| PEG-400          | 14.60                        | 7.50                        | 9.40                        | 18.90                     |
| TC               | 16.30                        | 7.20                        | 11.90                       | 21.40                     |
| IPA              | 15.80                        | 6.60                        | 14.30                       | 22.30                     |
| 1-BuOH           | 15.90                        | 6.30                        | 15.20                       | 22.90                     |
| EA               | 15.70                        | 5.60                        | 7.00                        | 18.10                     |
| DMSO             | 17.40                        | 14.20                       | 7.30                        | 23.60                     |
